# Supplementary material for: Examining the career progression and aspirations of Certified CHWs in Baltimore, Maryland
Source: Research Square preprint supplement (doi:10.21203/rs.3.rs-6941027/v1), 2025-08-21
Supplement: Supplementary file 1 [file 40a28ba1a4c1689f6f3ef5d5.docx]

Interview Guide

Certified CHW Interviews

1. Introduction and confirmation of consent
2. After contacting the interview subject by email and/or phone and they agree to participate in the study. An informed consent form will be emailed to them through DocuSign for their review and signature. Each subject will be given a week before a follow-up will be made and everyone that says they no longer want to participate will be thanked for their time.

Only people that send back signed informed consent will be further contacted. Upon receiving their DocuSign signed informed consent. They RA will contact the interview subject and schedule a one-hour period when they will be undisturbed to carry out the interview.

1. The RA will ask if the subject consents to the taping of the interview. If the individual does not consent, they are thanked for their time and released from the interview since the taped interviews signifies that the interview was carried out. After starting the tape, the R interviewee subject is asked to confirm their name and that they signed and returned the informed consent form.
2. Interview Questions
3. What were you doing before you did the CHW training with CMAHEC?
4. How long after the training did you get your certification?
5. What impediments if any did you face in getting certified?
6. Since certification what jobs have you had? Please provide the reasons you left each job or why you stayed at a job you loved.
7. What do you love about being a CHW?
8. Are you currently employed? (If unemployed, move to question 8, and modify for last job as indicated)
9. What is your current employment title and your employer?
10. Does your CHW training help you carry-out your role in your current (or last) job? if not, why?
11. What are the other certifications you hold apart from your CHW certification? (If no other certifications, move to Question 11).
12. How do you think CHW certification has complemented these other certifications to help you get a job? Please explain How?
13. What are your career goals moving forward?
14. Do you see yourself continuing to work within the health sector or another sector?
15. Do you have any insight about being a certified CHW that you would like to share.
16. Do you have any questions for me.

RA will now say “ Before we go, I would like to ask a few more questions that we need to know more about you for our research purposes only. I will read the questions, and you will give me your answer”

| Question | Answer | Follow-up |
| --- | --- | --- |
| What level education do you have? (Circle answer) | 1. High School graduate/GED 2. Some College 3. 2 year College graduate 4. 4 year College graduate 5. Some Graduate School work 6. Graduate School graduate | (If College or graduate school:  What was your major/ what graduate program did you do?) |
| What is your age? |  |  |
| What Race/Ethnicity do you consider yourself? |  |  |
| How many people live in your household? And how are they connected to you? |  |  |
| Do you have children? If yes, how many? |  |  |
| How much do you earn in your current position? (Just give us a ballpark on a per hour basis) |  |  |
|  |  |  |
|  |  |  |
